# Supplementary material
Source: Royal Society of Chemistry journal article supplement (doi:10.1039/d5fo05594f)
Supplement: d5fo05594f1.pdf [file d5fo05594f1.pdf]

1 **1. Supplementary Table 1.** 16s rRNA PCR reaction preparation

| Reagent                      | Volume ( $\mu\text{L}$ ) | Volume for 5 sample |
|------------------------------|--------------------------|---------------------|
| AmpliTaq reaction Master Mix | 6.25                     | 31.5                |
| 16s forward primer (27 F)    | 0.5                      | 2.5                 |
| 16s Rev primer (1492 F)      | 0.5                      | 2.5                 |
| PCR-grade water              | 4.25                     | 21.5                |
| Sample                       | 1                        | 1                   |
| Total Reaction Volume        | 12.5                     | 59                  |

2

3 **2. Supplementary Table 2.** Table 2. 16s rRNA PCR program

| Cycle                | Temperature | Time     | Cycle    |
|----------------------|-------------|----------|----------|
| Initial denaturation | 98          | 5 min    | N/A      |
| Denaturation         | 98          | 15 s     | 36 times |
| Annealing            | 60          | 30 s     |          |
| Extension            | 72          | 90 s     |          |
| Final Extension      | 72          | 5 min    | N/A      |
| Hold                 | 4           | Infinite | N/A      |

4

5 **3. DNA yield and quality**

6 High-quality chromosomal DNA was extracted from the microbial cells of both unfermented  
7 milk and fermented yoghurt analogues samples using GenElute Bacterial Genomic DNA kit  
8 (Sigma-Aldrich). Quantification was performed using a Qubit™ 4 Fluorometer with the  
9 dsDNA HS Assay Kit (Invitrogen). The DNA concentrations obtained across 10 samples varied  
10 considerably, ranging from 0.144 ng/ $\mu\text{L}$  in the unfermented milk base to a maximum of 7.76  
11 ng/ $\mu\text{L}$  in Yoghurt 2 (Y2) after 14 days of storage (Table 4). DNA samples with concentrations  
12 below 1 ng/ $\mu\text{L}$  were concentrated using a SpeedVac centrifugal vacuum system to ensure  
13 sufficient input for downstream analyses. Variability in DNA yield was attributed to two key  
14 factors: (i) procedural inconsistencies in handling a high number of isolates during  
15 simultaneous extractions, and (ii) differing microbial cells across inoculated yoghurt  
16 formulations and time points.

17 **4. Supplementary Table 3.** Yields of DNA isolated from microbial cells by GenElute  
18 Bacterial DNA kit

| Sample   | Concentration<br>(ng/uL) | After speedvacuum<br>concentration | Volume ( $\mu$ L) |
|----------|--------------------------|------------------------------------|-------------------|
| Milk_6 h | 0.144                    | 0.5                                | 28                |
| Y1_6 h   | 11.8                     | 11.8                               | 28                |
| Y3_6 h   | 0.844                    | 2.12                               | 28                |
| Y3_6 h   | 0.716                    | 2.01                               | 28                |
| Y1_14 d  | 0.55                     | 1.5                                | 28                |
| Y2_14 d  | 7.76                     | 7.76                               | 28                |
| Y3_14 d  | 2.10                     | 2.1                                | 28                |
| Y1_28 d  | 2.04                     | 2.04                               | 28                |
| Y2_28 d  | 6.38                     | 6.38                               | 28                |
| Y3_28 d  | 4.06                     | 4.06                               | 28                |

19

#### 20 **5. DNA integrity and size distribution**

21 Size fractionation of 16S rRNA gene fragments were evaluated by agarose gel electrophoresis  
22 on a 0.8% agarose gel containing 2.5  $\mu$ L per 25 ml of Tris Acetate-EDTA buffer. While smear  
23 patterns indicated DNA presence, the concentration was below the threshold for visual  
24 detection by gel imaging (Figure 5). However, DNA integrity and fragment size distribution  
25 were validated through the Agilent DNA LabChip system.

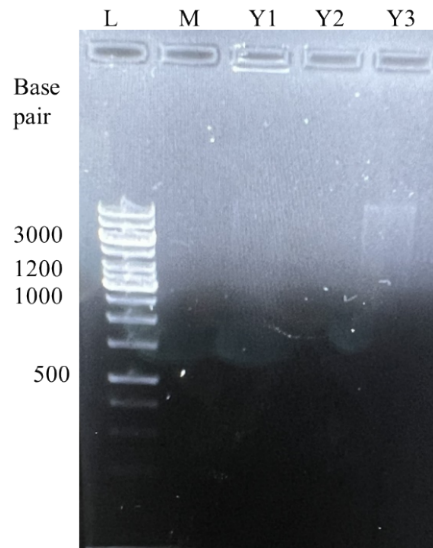

26

27 **Supplementary Figure 1.** Agarose gel electrophoresis at 0.8% of the PCR products purified  
 28 from PCR reactions performed using oligonucleotides for bacterial isolates of yoghurt during  
 29 fermentation and refrigerated storage. The samples were fermented with the following cultures:  
 30 *L. delbrueckii sub bulgaricus*, *S. thermophilus* and *Lactobacillus rhamnosus* (Yoghurt Y1); *L.*  
 31 *delbrueckii subs. Bulgaricus*, *Streptococcus thermophilus*, *L. casei* 431 (Yoghurt Y2);  
 32 *Lactobacillus plantarum*, BB12 (*Bifidobacterium sps*) (Yoghurt Y3), Milk (M) and GeneRular  
 33 DNA Ladder Mix (L), Band size in base pair (bp) are indicated.

34 DNA LabChip analysis revealed consistent amplicon across yoghurt samples and storage  
 35 conditions (Figure 6). The sample details of DNA LabChip analysis are mentioned in  
 36 Supplementary Table 3. Yoghurt 1 (Y1) exhibited DNA fragments of approximately 732 bp  
 37 (base pair) post-fermentation (6 h), decreasing slightly to 715 bp and 664 bp at 14 and 28 days,  
 38 respectively. Similarly, Yoghurt 2 (Y2) yielded 684 bp fragments after fermentation, followed  
 39 by 673 bp and 699 bp over storage. Yoghurt 3 (Y3) displayed 681 bp after 6 hours, with slight  
 40 variation to 671 bp and 674 bp subsequent storage points. These results suggest stable 16S  
 41 rRNA gene amplification profiles, confirming the reliability of microbial DNA extraction and  
 42 downstream sequencing protocols.

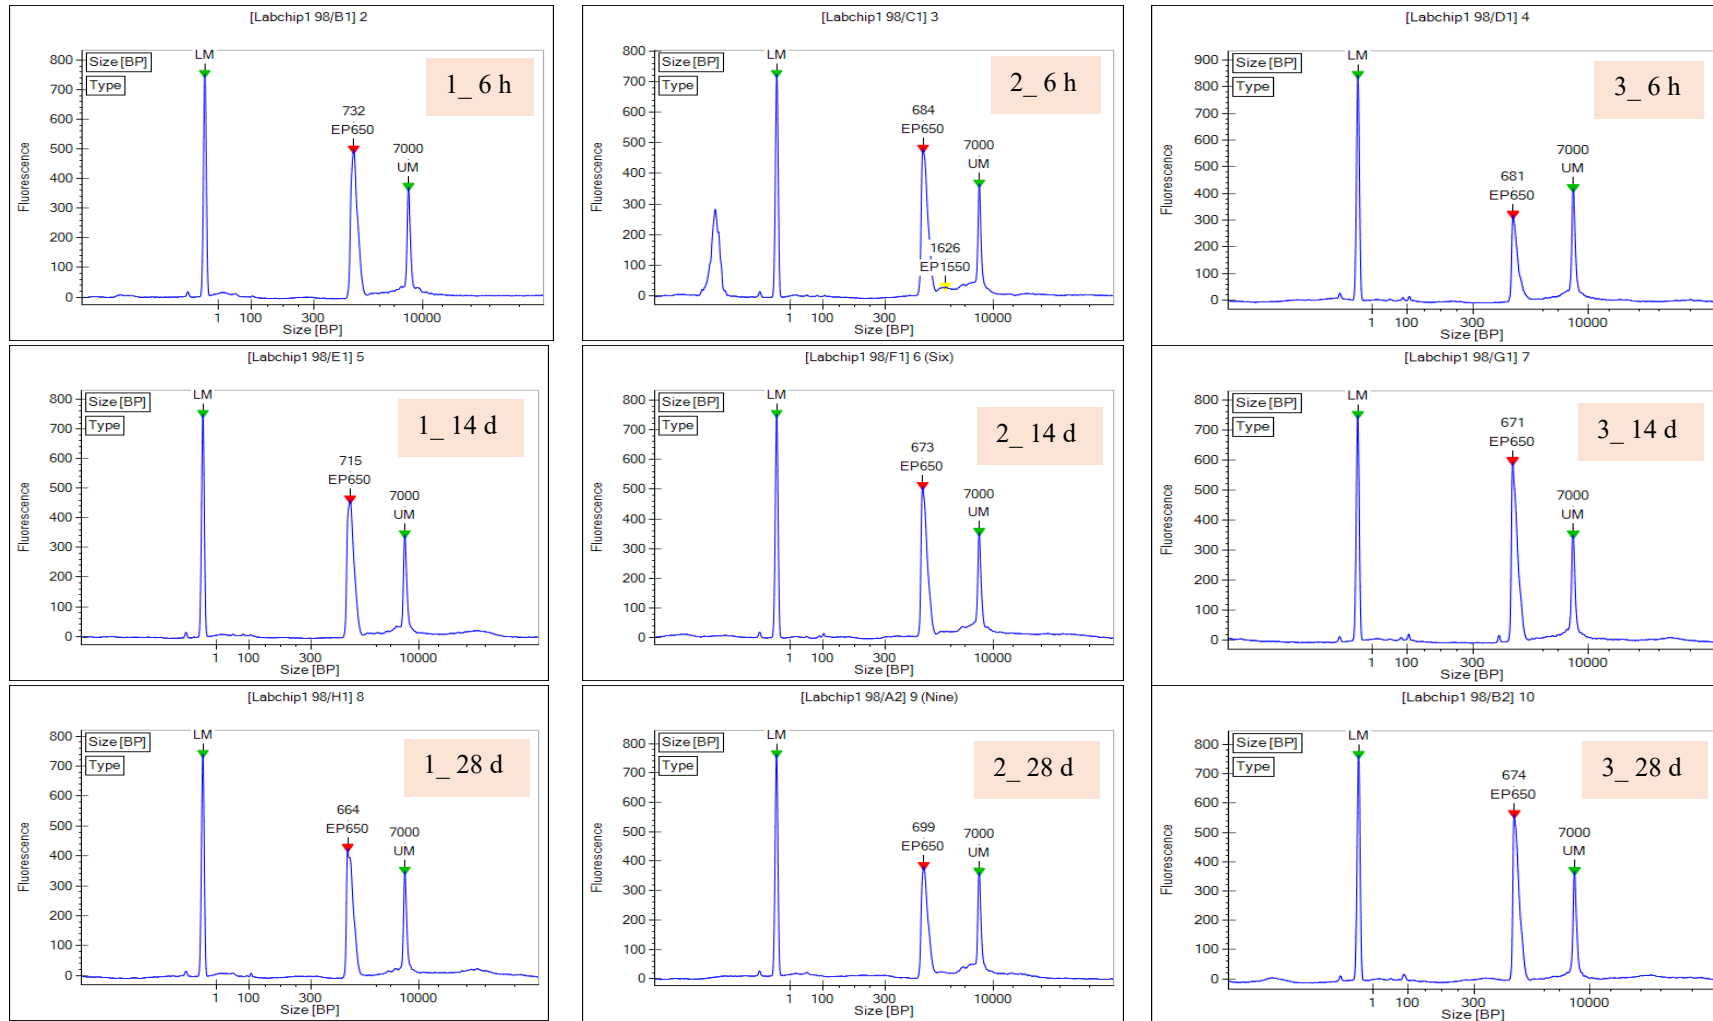

44

45 **Supplementary Figure 2.** Quantity and size fractionation of microbial DNA using LabChip during yoghurt fermentation and refrigerated storage.

46 The samples were fermented with the following cultures: *L. delbrueckii sub bulgaricus*, *S. thermophilus* and *Lactobacillus rhamnosus* (Yoghurt

47 Y1); *L. delbrueckii* subs. *Bulgaricus*, *Streptococcus thermophilus*, *L. casei* 431 (Yoghurt Y2); *Lactobacillus plantarum*, BB12 (*Bifidobacterium*  
48 *sps*) (Yoghurt Y3).

49 **6. Supplementary Table 4** Sample details for the microbiota dynamics including metagenomic analysis, in lupin-oat based milk and  
 50 yoghurt analogues fermented by different combinations of probiotic cultures during storage at 4 °C for 28 days.

**Sample details**

0\_hr: Unfermented milk sample

1\_6hr, 1\_14day, 1\_28day: Yoghurt 1 fermented with *Lactobacillus delbrueckii sub bulgaricus*, *Streptococcus thermophilus* and *Lactobacillus rhamnosus*, samples taken after 6 hr, 14 day and 28 day.

2\_6hr, 2\_14day, 2\_28day: Yoghurt 2 fermented with *Lactobacillus delbrueckii sub bulgaricus*, *Streptococcus thermophilus* and *Lactobacillus paracasei*, samples taken after 6 hr, 14 day and 28 day.

3\_6hr, 3\_14day, 3\_28day: Yoghurt 3 fermented with *Lactobacillus plantarum* and *Bifidobacterium sps*, samples taken after 6 hr, 14 day and 28 day.

| No. | Sample Name | Sample Source | Details |
|-----|-------------|---------------|---------|
| 1   | 1           | 0_hr          | Milk    |
| 2   | 2           | 1_6 hr        | Yoghurt |
| 3   | 3           | 2_6 hr        | Yoghurt |
| 4   | 4           | 3_6 hr        | Yoghurt |
| 5   | 5           | 1_14 day      | Yoghurt |
| 6   | 6 (Six)     | 2_14 day      | Yoghurt |
| 7   | 7           | 3_14 day      | Yoghurt |
| 8   | 8           | 1_28 day      | Yoghurt |
| 9   | 9 (Nine)    | 2_28 day      | Yoghurt |
| 10  | 10          | 3_28 day      | Yoghurt |

52 **7. Raw data quality for metagenomic analysis**

53 High throughput 16S rRNA amplicon sequencing generated robust datasets across all samples.

54 Detailed sequencing metrics are presented in Table 5. For each sample, key indicators included:

- 55 • PE Reads: Paired-end raw counts
- 56 • AvgLen (bp): Average read length
- 57 • GC Content (%): Proportion of guanine and cytosine bases in total sequences
- 58 • Q20/Q30 (%): Quality scores indicating the percentage of bases with Phred scores  $\geq$   
59 Q20 and Q30, reflecting high base-calling accuracy
- 60 • Clean Tags: Proportion of reads retained post-filtering for quality and adaptors

61 Across all samples, sequencing quality was high, with Q20 and Q30 values consistently

62 exceeding standard benchmarks (>97% and >93%, respectively), ensuring data suitability for

63 reliable taxonomic profiling and comparative microbial community analysis.

**8. Supplementary Table 5.** Statistics on sequencing data processing

| <b>Sample ID</b>        | <b>PE Reads</b> | <b>AvgLen(bp)</b> | <b>GC(%)</b> | <b>Q20(%)</b> | <b>Q30(%)</b> | <b>Clean_tags</b> |
|-------------------------|-----------------|-------------------|--------------|---------------|---------------|-------------------|
| Bacteria_CG685-001M0001 | 79,800          | 247               | 53.50        | 97.49         | 92.87         | 79,800            |
| Bacteria_CG685-001M0002 | 80,266          | 247               | 53.01        | 97.52         | 93.09         | 80,266            |
| Bacteria_CG685-001M0003 | 80,229          | 247               | 53.06        | 97.73         | 93.49         | 80,229            |
| Bacteria_CG685-001M0004 | 79,886          | 247               | 54.53        | 97.83         | 93.69         | 79,886            |
| Bacteria_CG685-001M0005 | 80,157          | 247               | 53.05        | 97.83         | 93.62         | 80,157            |
| Bacteria_CG685-001M0006 | 80,049          | 247               | 53.05        | 97.57         | 93.23         | 80,049            |
| Bacteria_CG685-001M0007 | 79,794          | 247               | 54.78        | 97.85         | 93.73         | 79,794            |
| Bacteria_CG685-001M0008 | 79,957          | 247               | 53.01        | 97.56         | 93.14         | 79,957            |
| Bacteria_CG685-001M0009 | 80,165          | 247               | 53.05        | 97.85         | 93.76         | 80,165            |
| Bacteria_CG685-001M0010 | 79,828          | 247               | 54.55        | 97.85         | 93.80         | 79,828            |

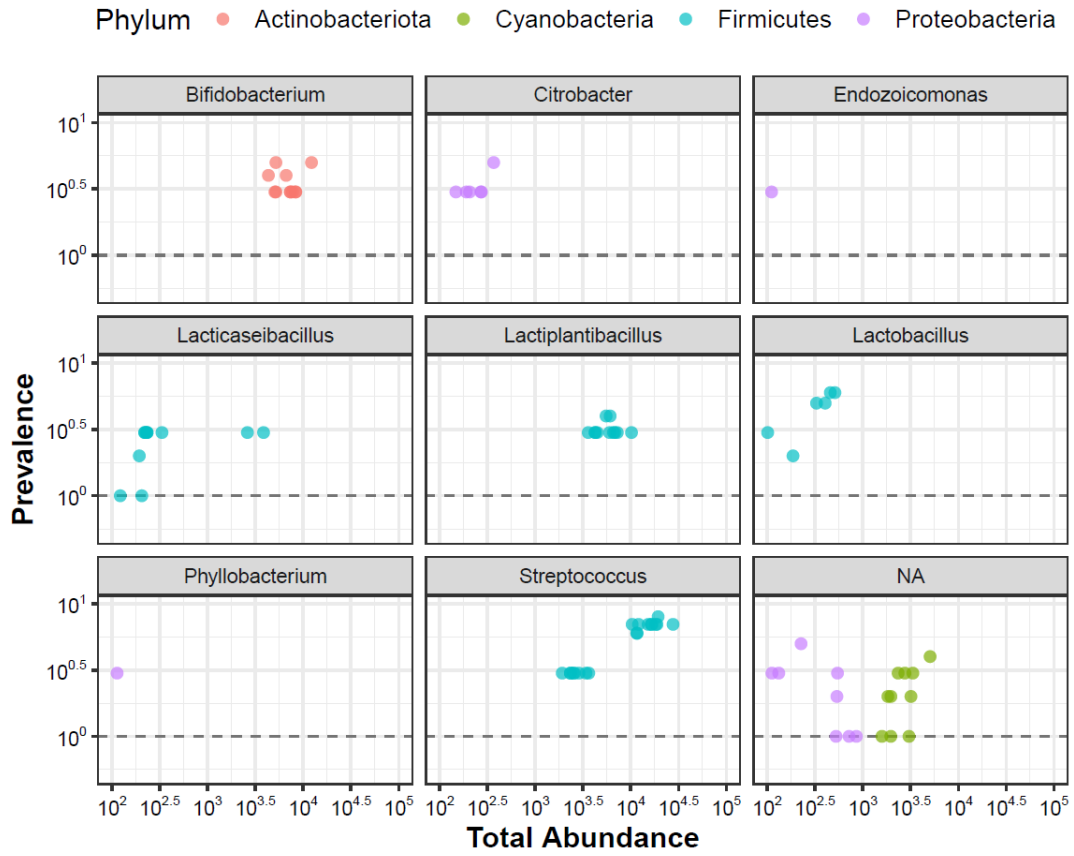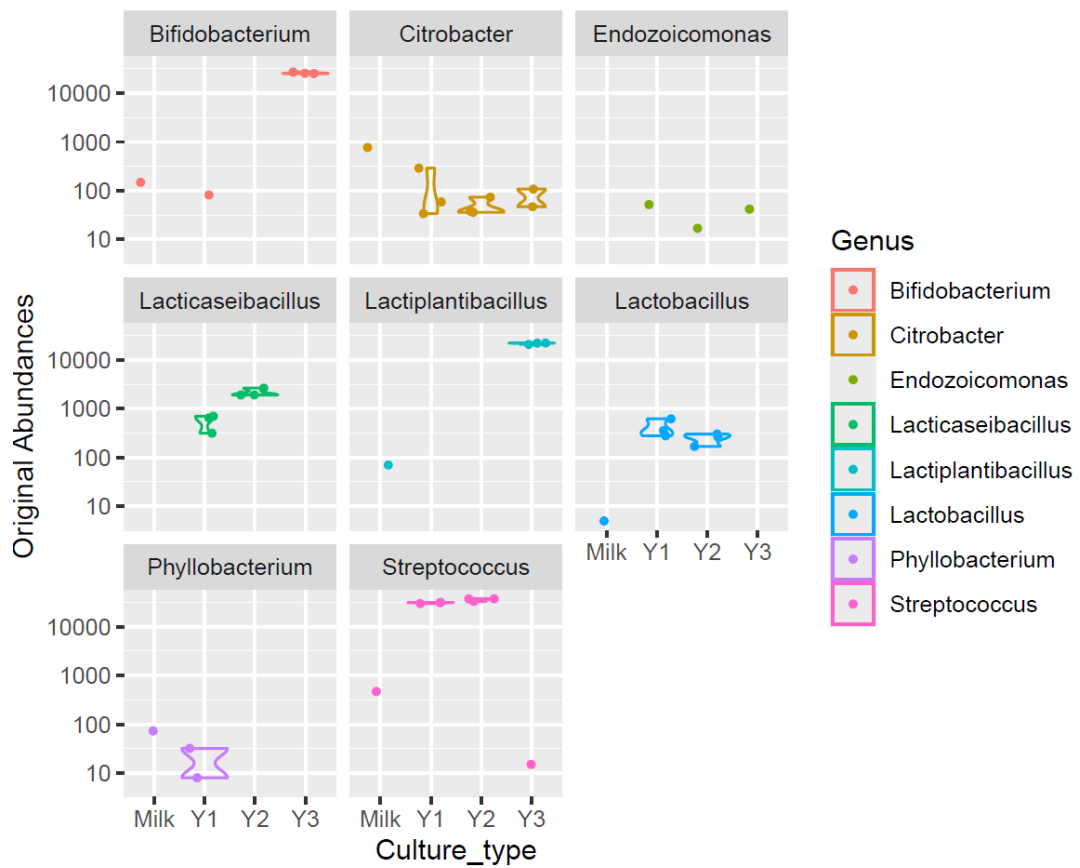

70 **Supplementary Figure 3.** Total abundance of total microbiota composition (A) Phylum type  
71 and (B) Genus type of yoghurt after fermentation and refrigerated storage. The samples were  
72 fermented with the following cultures: *L. delbrueckii sub bulgaricus*, *S. thermophilus* and  
73 *Lactobacillus rhamnosus* (Yoghurt Y1); *L. delbrueckii subs. Bulgaricus*, *Streptococcus*  
74 *thermophilus*, *L. casei* 431 (Yoghurt Y2); *Lactobacillus plantarum*, BB12 (*Bifidobacterium*  
75 *sps*) (Yoghurt Y3).

76



|         |                                                                  |   |  |   |   |   |   |   |   |   |   |   |
|---------|------------------------------------------------------------------|---|--|---|---|---|---|---|---|---|---|---|
|         | 2-Decenal, (E)-                                                  | + |  | + | + | + | + | + | + | + | + | + |
|         | 2-Tridecenal, (E)-                                               |   |  | + | + | + | + | + | + | + | + | + |
| Acids   | Butanoic acid                                                    |   |  |   |   | + | + | + | + | + | + | + |
|         | Hexanoic acid                                                    |   |  |   | + | + |   | + | + |   | + | + |
|         | Hexanoic acid, anhydride                                         |   |  |   |   |   |   | + |   |   | + | + |
|         | Octanoic acid                                                    |   |  |   |   | + |   |   |   |   |   |   |
|         | 2-Octynoic acid                                                  |   |  |   |   |   |   |   |   |   |   | + |
| Esters  | Cyclopropanecarboxylic acid, butyl ester                         |   |  |   |   |   |   | + | + | + | + | + |
|         | Propanoic acid, 2-methyl-, 3-hydroxy-2,4,4-trimethylpentyl ester | + |  | + | + | + | + | + | + | + | + | + |
| Ketones | 2-Heptanone                                                      | + |  |   | + | + |   | + | + |   | + | + |
|         | 4-Octanone                                                       | + |  | + | + | + | + | + | + | + | + | + |
|         | 3,5-Octadien-2-one, (E,E)-                                       |   |  |   |   |   |   |   | + |   |   |   |
|         | 2-Nonanone                                                       |   |  |   | + | + | + | + | + | + | + | + |
|         | Cyclooctanone                                                    |   |  |   |   | + | + | + | + | + | + | + |
|         | $\beta$ -Damascenone                                             |   |  | + | + | + | + | + | + | + | + | + |
|         | 3-Methyl-3,5--(cyanoethyl)tetrahydro-4-thiopyranone              |   |  |   |   |   |   |   | + |   |   | + |
|         | 2,3-Octanedione                                                  |   |  |   | + | + | + | + | + | + | + | + |
| Phenols | Phenol, 4-(1-methylpropyl)-                                      |   |  | + | + | + | + | + | + | + | + | + |
| Alkenes | D-Limonene                                                       |   |  |   |   |   |   | + | + | + | + | + |
|         | 1,3-Hexadiene, 3-ethyl-2-methyl-                                 | + |  | + | + | + | + | + | + | + | + | + |
| Alkanes | 6-Methyl-1,7-diazabicyclo[4.1.0]heptane                          |   |  |   |   |   |   |   | + |   |   | + |
|         | Hexadecane                                                       |   |  |   |   | + | + | + | + | + | + | + |
|         | Nonane, 5-(1-methylpropyl)-                                      |   |  |   |   |   | + | + | + | + | + | + |
|         | Undecane, 3-methyl-                                              |   |  |   |   |   |   |   |   | + |   |   |
|         | Cyclobutane, 2-ethyl-1-methyl-3-propyl-                          |   |  |   |   |   |   |   | + |   |   | + |
|         | Nonane, 2,6-dimethyl-                                            |   |  |   |   |   |   | + | + | + | + | + |
|         | Decane, 3,6-dimethyl-                                            |   |  | + | + | + | + | + | + | + | + | + |
|         | Silane, cyclohexyldimethoxymethyl-                               | + |  |   |   |   |   |   |   |   |   |   |
|         | Dodecane                                                         | + |  | + | + | + | + | + | + | + | + | + |
|         | Undecane, 2,6-dimethyl-                                          |   |  |   |   | + | + | + | + | + | + | + |

|        |                                                             |   |  |   |  |  |   |   |   |   |   |   |
|--------|-------------------------------------------------------------|---|--|---|--|--|---|---|---|---|---|---|
|        | Undecane, 2,6-dimethyl-                                     |   |  |   |  |  | + |   | + | + | + | + |
|        | Tridecane                                                   |   |  |   |  |  | + | + | + | + | + | + |
|        | Hexane, 3,3-dimethyl-                                       | + |  | + |  |  | + | + | + | + | + | + |
| Others | Pyridine, 2,3,4,5-tetrahydro-                               |   |  |   |  |  | + |   | + |   |   | + |
|        | Isobutyl octyl carbonate                                    |   |  |   |  |  |   |   |   | + |   |   |
|        | Piperidine, 3-methyl-                                       |   |  |   |  |  |   |   |   | + |   | + |
|        | Methylpent-4-enylamine                                      |   |  |   |  |  | + | + | + | + | + | + |
|        | 1,3-Propanediamine, N-methyl-                               |   |  |   |  |  |   |   |   |   | + |   |
|        | Estra-1,3,5(10),6-tetraen-17-one, 3-hydroxy-, O-methyloxime |   |  |   |  |  | + | + |   | + | + | + |
|        | 1,3-Propanediamine, N-methyl-                               |   |  |   |  |  | + | + | + | + | + | + |
|        | N-(Trimethylsilyl)-N-((trimethylsilyl)oxy)benzamide         |   |  |   |  |  | + |   |   | + | + | + |
|        | N-Methylallylamine                                          |   |  |   |  |  | + | + | + | + | + | + |
|        | Benzene, 1,3-bis(1,1-dimethylethyl)-                        | + |  | + |  |  | + | + | + | + | + | + |
|        | 1,3-Propanediamine, N-methyl-                               |   |  |   |  |  |   |   |   |   | + | + |
|        | 1,3-Propanediamine, N-methyl-                               |   |  |   |  |  |   |   |   |   |   | + |
|        | 1,3-Propanediamine, N-methyl-                               |   |  |   |  |  |   |   | + | + | + | + |

80 + Compound was detected qualitatively

81 0 h, 6 h, 14 d and 28 d are fermentation periods in hour (h) and days (d)

82

83

84

85

86

87



|                                        |                                                            |   |   |   |   |   |   |   |   |   |   |
|----------------------------------------|------------------------------------------------------------|---|---|---|---|---|---|---|---|---|---|
| Oxidized fatty acids                   | Unknown fatty acid                                         | + | + | + | + | + | + | + | + | + | + |
| Linoleic acids                         | (9Z,12E)-15,16-dihydroxyoctadeca-9,12-dienoic acid 2       | + | + | + | + | + | + | + | + | + | + |
| Linoleic acids                         | (9Z,12E)-15,16-dihydroxyoctadeca-9,12-dienoic acid 3       | + | + | + | + | + | + | + | + | + | + |
| Linoleic acids                         | 9-hydroxy-10,12-octadecadienoic acid 1                     | + | + | + | + | + | + | + | + | + | + |
| Linoleic acids                         | 9-hydroxy-10,12-octadecadienoic acid 2                     | + | + | + | + | + | + | + | + | + | + |
| Long-chain fatty acids                 | Lichesterylic acid 1                                       | + | + | + | + | + | + | + | + | + | + |
| Long-chain fatty acids                 | Lichesterylic acid 2                                       | + | + | + | + | + | + | + | + | + | + |
| Octadecanoids                          | 9-hydroxyoctadeca-10,12-dienoic acid                       | + | + | + | + | + | + | + | + | + | + |
| Long-chain fatty acids                 | 12-Hydroxyoctadecanoic acid                                |   |   |   |   |   |   |   | + | + | + |
| Lipids                                 | Unknown lysophosphatidylethanolamine                       | + | + |   |   |   |   |   |   | + | + |
| Long-chain fatty acids                 | 9-stearolic acid                                           |   | + | + | + | + | + | + | + | + | + |
| Long-chain fatty acids                 | Hexadecanoic acid                                          | + | + | + | + | + | + | + | + | + | + |
| <i>Positive mode [M+H]<sup>+</sup></i> |                                                            |   |   |   |   |   |   |   |   |   |   |
| Flavonoids                             |                                                            |   |   |   |   |   |   |   |   |   |   |
| Flavones                               | Luteolin-4'-O-glucoside                                    |   | + | + | + | + |   | + | + |   | + |
| Flavones                               | Vaccarin                                                   | + | + | + | + | + | + | + | + | + | + |
| Flavones                               | Apigenin 6,8-digalactoside                                 | + | + | + | + | + | + | + | + | + | + |
| Flavanones                             | tris(2,4-ditert-butylphenyl) phosphate                     | + | + | + | + | + |   | + | + | + | + |
| Phenolic acids                         |                                                            |   |   |   |   |   |   |   |   |   |   |
| Simple phenolic acids                  | Phthalic acid                                              |   |   |   |   |   |   |   |   |   | + |
| Others: non-phenolic compounds         |                                                            |   |   |   |   |   |   |   |   |   |   |
| Pyridine alkaloids                     | Trigonelline                                               | + | + | + | + | + |   | + | + | + | + |
| Piperidines                            | 4-Hydroxy-1-(2-hydroxyethyl)-2,2,6,6-tetramethylpiperidine | + | + | + |   | + |   | + | + | + | + |
| Purine alkaloids                       | Adenine                                                    | + |   | + | + | + | + | + | + | + |   |
| Dipeptides                             | L-Prolyl-L-isoleucine                                      | + | + | + | + | + | + | + | + | + | + |
| Bipyridines and oligopyridines         | Anabasamine                                                | + | + | + | + | + | + | + | + | + | + |
| Dipeptides                             | L-Prolyl-L-isoleucine                                      | + | + | + | + | + |   | + | + | + | + |

|                        |                                                                                                                                                                                                             |   |   |   |   |   |   |   |   |   |   |   |   |
|------------------------|-------------------------------------------------------------------------------------------------------------------------------------------------------------------------------------------------------------|---|---|---|---|---|---|---|---|---|---|---|---|
| Dipeptides             | Glutamyltyrosine                                                                                                                                                                                            | + | + | + | + | + | + | + | + | + | + | + |   |
| Triterpenoids          | Dehydrotumulosic acid                                                                                                                                                                                       |   |   |   |   |   | + |   |   |   |   |   |   |
| Lysine alkaloids       | Matrine                                                                                                                                                                                                     | + | + | + | + | + | + | + | + | + | + | + |   |
| Purine alkaloids       | Deethylatrazine                                                                                                                                                                                             | + | + | + | + | + | + | + | + | + | + | + |   |
| Stilbenoids            | Erianin                                                                                                                                                                                                     | + | + | + | + | + | + | + | + | + | + | + |   |
| Steroids               | Halistanol sulfate 2                                                                                                                                                                                        | + | + | + | + | + | + | + | + | + | + | + |   |
| Alkaloids              | Anileridine                                                                                                                                                                                                 |   |   |   |   |   |   |   |   |   |   |   |   |
| Furofuranoid lignans   | Eudesmin                                                                                                                                                                                                    | + | + | + | + | + | + | + | + | + | + | + |   |
| Glycerophospholipids   | Unknown lysophosphatidylcholine 1                                                                                                                                                                           | + | + |   | + |   |   |   |   |   |   | + |   |
| Glycerophospholipids   | Unknown lysophosphatidylcholine 2                                                                                                                                                                           | + | + | + | + | + | + | + | + | + | + | + |   |
| 1,3-Aminoalcohols      | D-ribo-Phytosphingosine                                                                                                                                                                                     |   |   |   |   |   |   |   |   |   |   | + |   |
| Linoleic acids         | Octadeca-9,12,15-trienoic acid                                                                                                                                                                              |   |   |   |   |   |   | + | + |   |   | + |   |
| N-Acylethanolamines    | Linoleoyl Ethanolamide                                                                                                                                                                                      |   |   |   |   |   |   |   |   |   | + | + |   |
| Isoquinoline alkaloids | Thalsimine                                                                                                                                                                                                  | + | + | + |   | + | + | + | + | + | + | + |   |
| Phenylmethylamine      | Piptamine                                                                                                                                                                                                   | + | + | + | + | + | + | + | + | + | + | + |   |
| N-Acylethanolamines    | Oleoyl Ethanolamide                                                                                                                                                                                         |   |   |   |   |   |   |   |   |   |   | + |   |
| Glycerophosphocholines | (3-hexadecanoyloxy-2-hydroxy-propyl) 2-(trimethylammonio)ethyl phosphate                                                                                                                                    |   |   |   |   |   |   |   |   |   |   |   | + |
| Benzoic acid esters    | Diethylphthalate                                                                                                                                                                                            | + | + | + | + | + | + | + | + |   |   |   | + |
| Piperidine alkaloids   | 2-[5-amino-10-hydroxy-17-[2-(5-hydroxy-3-imidazol-1-yl-6-methyl-2-piperidyl)ethyl]-13-(hydroxymethyl)-7-methyl-4,8-diazatricyclo[17.3.1.1 <sup>3,7</sup> ]]tetracos-1(22),19(23),20-trien-10-yl]acetic acid |   |   |   |   |   |   |   |   |   |   | + | + |

91 + Compound was detected qualitatively

92 0 h, 6 h, 14 d and 28 d are fermentation periods in hour (h) and days (d)
